# Supplementary material for: The tertiary structure of the human Xkr8–Basigin complex that scrambles phospholipids at plasma membranes
Source: PubMed Central journal article supplement (PMC8500837; doi:10.1038/s41594-021-00665-8), 2021-10-08
Supplement: 41594_2021_665_MOESM2_ESM.pdf [file 41594_2021_665_MOESM2_ESM.pdf]

## Reporting Summary

Nature Research wishes to improve the reproducibility of the work that we publish. This form provides structure for consistency and transparency in reporting. For further information on Nature Research policies, see our [Editorial Policies](#) and the [Editorial Policy Checklist](#).

### Statistics

For all statistical analyses, confirm that the following items are present in the figure legend, table legend, main text, or Methods section.

n/a Confirmed

- The exact sample size ( $n$ ) for each experimental group/condition, given as a discrete number and unit of measurement
- A statement on whether measurements were taken from distinct samples or whether the same sample was measured repeatedly
- The statistical test(s) used AND whether they are one- or two-sided  
*Only common tests should be described solely by name; describe more complex techniques in the Methods section.*
- A description of all covariates tested
- A description of any assumptions or corrections, such as tests of normality and adjustment for multiple comparisons
- A full description of the statistical parameters including central tendency (e.g. means) or other basic estimates (e.g. regression coefficient) AND variation (e.g. standard deviation) or associated estimates of uncertainty (e.g. confidence intervals)
- For null hypothesis testing, the test statistic (e.g.  $F$ ,  $t$ ,  $r$ ) with confidence intervals, effect sizes, degrees of freedom and  $P$  value noted  
*Give  $P$  values as exact values whenever suitable.*
- For Bayesian analysis, information on the choice of priors and Markov chain Monte Carlo settings
- For hierarchical and complex designs, identification of the appropriate level for tests and full reporting of outcomes
- Estimates of effect sizes (e.g. Cohen's  $d$ , Pearson's  $r$ ), indicating how they were calculated

*Our web collection on [statistics for biologists](#) contains articles on many of the points above.*

### Software and code

Policy information about [availability of computer code](#)

Data collection SHIKA as of October 2018, KUMA as of October 2018

Data analysis autoPROC v1.0.5, STRANISO v2.3.36, CCP4 v7.1, Molrep v11.7.03, Refmac v5.8.0267, PHENIX v1.19rc2\_4022, Coot v0.9, CTFFIND v4, RELION v3.1, RStudio v1.1.463, PyMol v2.4.0, UCSF Chimera v1.13.1, UCSF ChimeraX v0.93, FlowJo7.6.5, FACSDiva v6.1.3

For manuscripts utilizing custom algorithms or software that are central to the research but not yet described in published literature, software must be made available to editors and reviewers. We strongly encourage code deposition in a community repository (e.g. GitHub). See the Nature Research [guidelines for submitting code & software](#) for further information.

### Data

Policy information about [availability of data](#)

All manuscripts must include a [data availability statement](#). This statement should provide the following information, where applicable:

- Accession codes, unique identifiers, or web links for publicly available datasets
- A list of figures that have associated raw data
- A description of any restrictions on data availability

The cryo-EM density map for hXkr8-hBSGΔ-Fab18 was deposited in the Electron Microscopy Data Bank (accession number: EMD-30636). The coordinates for the models of the hXkr8-hBSGΔ-Fab18 complex were deposited in the Protein Data Bank (PDB) under the accession code PDB 7DCE. The coordinates and structural factors of Fab14 and the hBSG (domain2)-Fab14 complex were deposited in PDB under accession codes PDB 7D9Z and PDB 7DAA, respectively. The mass spectrometry data was deposited in the ProteomeXchange Consortium under accession code PXD027776. All other data are available from the corresponding authors upon reasonable request. Several structural coordinates in the PDB database were used in this study, which can be located by accession numbers 3B5H, 4ma3, and 1ln2.

## Field-specific reporting

Please select the one below that is the best fit for your research. If you are not sure, read the appropriate sections before making your selection.

Life sciences       Behavioural & social sciences       Ecological, evolutionary & environmental sciences

For a reference copy of the document with all sections, see [nature.com/documents/nr-reporting-summary-flat.pdf](https://nature.com/documents/nr-reporting-summary-flat.pdf)

## Life sciences study design

All studies must disclose on these points even when the disclosure is negative.

|                 |                                                                                                                                                                                                                                                                                                                                                                                                                                                             |
|-----------------|-------------------------------------------------------------------------------------------------------------------------------------------------------------------------------------------------------------------------------------------------------------------------------------------------------------------------------------------------------------------------------------------------------------------------------------------------------------|
| Sample size     | Sample sizes were not pre-determined. X-ray diffraction and Cryo-EM images were collected until structures of satisfactory quality were solved, which suggested sufficient sample size. For biochemical and cellular experiments, no information was derived about a population based on sampling, and therefore sample size determination was not necessary.                                                                                               |
| Data exclusions | No data were excluded.                                                                                                                                                                                                                                                                                                                                                                                                                                      |
| Replication     | For all experiments presented as representative images in Fig. 1a and 1b, Fig. 2e, 3b, 5g and Extended Data Fig. 1b, 3-5 biological replicates were performed. The experiments presented in Fig. 2c and Fig. 3c were performed twice. The experiments presented in Fig. 1a (SDS-PAGE) and Extended Data Fig. 1d and 1e were performed more than 5 times. All other experiments were performed at least three times and described in legend for each Figure. |
| Randomization   | No group allocation was performed in this study                                                                                                                                                                                                                                                                                                                                                                                                             |
| Blinding        | Blinding was not performed as subjective analysis was not needed. Each experiment was analyzed using consistent methods. Quantitative measurements using various approaches and reaction kits as described in the methods minimized biased assessments.                                                                                                                                                                                                     |

## Reporting for specific materials, systems and methods

We require information from authors about some types of materials, experimental systems and methods used in many studies. Here, indicate whether each material, system or method listed is relevant to your study. If you are not sure if a list item applies to your research, read the appropriate section before selecting a response.

### Materials & experimental systems

| n/a                                 | Involved in the study                                           |
|-------------------------------------|-----------------------------------------------------------------|
| <input type="checkbox"/>            | <input checked="" type="checkbox"/> Antibodies                  |
| <input type="checkbox"/>            | <input checked="" type="checkbox"/> Eukaryotic cell lines       |
| <input checked="" type="checkbox"/> | <input type="checkbox"/> Palaeontology and archaeology          |
| <input type="checkbox"/>            | <input checked="" type="checkbox"/> Animals and other organisms |
| <input checked="" type="checkbox"/> | <input type="checkbox"/> Human research participants            |
| <input checked="" type="checkbox"/> | <input type="checkbox"/> Clinical data                          |
| <input checked="" type="checkbox"/> | <input type="checkbox"/> Dual use research of concern           |

### Methods

| n/a                                 | Involved in the study                              |
|-------------------------------------|----------------------------------------------------|
| <input checked="" type="checkbox"/> | <input type="checkbox"/> ChIP-seq                  |
| <input type="checkbox"/>            | <input checked="" type="checkbox"/> Flow cytometry |
| <input checked="" type="checkbox"/> | <input type="checkbox"/> MRI-based neuroimaging    |

## Antibodies

|                 |                                                                                                                                                                                                                                                                                                                                                                                                                                                                                                                                                                                                                                                                                                                                                                                                                                                                                                                                                                                                                                                                                   |
|-----------------|-----------------------------------------------------------------------------------------------------------------------------------------------------------------------------------------------------------------------------------------------------------------------------------------------------------------------------------------------------------------------------------------------------------------------------------------------------------------------------------------------------------------------------------------------------------------------------------------------------------------------------------------------------------------------------------------------------------------------------------------------------------------------------------------------------------------------------------------------------------------------------------------------------------------------------------------------------------------------------------------------------------------------------------------------------------------------------------|
| Antibodies used | Rabbit HRP-anti-GFP antibody (Anti-GFP pAb-HRP-Direct) MBL Cat# 598-7 (1: 10000)<br>Mouse HRP-anti-HA mAb (Direct-Blot HRP anti-HA.11 Epitope Tag antibody) (Clone 16B12) BioLegend Cat#901519 (1:3000)<br>Rabbit mAb against human Xkr8-Basigin complex (established in this report) (Clones XBA14 and XBA18)                                                                                                                                                                                                                                                                                                                                                                                                                                                                                                                                                                                                                                                                                                                                                                    |
| Validation      | HRP-labeled rabbit anti-GFP Ab was validated by MBL for Western blot ( <a href="https://ruo.mbl.co.jp/bio/e/dtl/A/?pcd=598-7">https://ruo.mbl.co.jp/bio/e/dtl/A/?pcd=598-7</a> ) and previous publications (PMID:23840565, 26272249, 27578797, 27707755, 28369861, 28384198, 28588310, 30367048, and 32866183). HRP-labeled mouse anti-HA mAb was validated by BioLegend for Western blot ( <a href="https://www.biolegend.com/en-us/products/direct-blot-hrp-anti-ha11-epitope-tag-antibody-14398?GroupID=GROUP26">https://www.biolegend.com/en-us/products/direct-blot-hrp-anti-ha11-epitope-tag-antibody-14398?GroupID=GROUP26</a> ) and previous publications (PMID: 28827538, 28598330, 28082682, 28087701, 28053031, 28069948, 27909245, 27797818, 27834731)<br>Rabbit anti-human Xkr8-BSG mAb (clones XBA14 and XBA18), established in this study, was validated by Flow cytometry with mouse cell transformants expressing or not-expressing human Xkr8-Bsg complex. The Cryo-EM image of Xkr8-Bsg-Fab (XBA18) confirmed the binding of this mAb to the Xkr8-Bsg complex. |

## Eukaryotic cell lines

Policy information about [cell lines](#)

Cell line source(s) HEK293T (ATCC CRL-3216)

|                                                                      |                                                                                                                                                                                                                                                                                                                      |
|----------------------------------------------------------------------|----------------------------------------------------------------------------------------------------------------------------------------------------------------------------------------------------------------------------------------------------------------------------------------------------------------------|
| Cell line source(s)                                                  | DKO, a derivative of WR19L (ATCC TIB-52)<br>Spodoptera frugiperda (SF) 9 cells (ATCC CRL-1711)<br>Human PLB985 cells, a subline of human HL-60 (ATCC CCL-240)<br>TMEM16-/-Xkr8-/- Ba/F3, a derivative of mouse Ba/F3 (ATCC HB-283)<br>FreeStyle™ 293-F Cells (Thermo Fisher Scientific R79007)<br>EL-4 (ATCC TIB-39) |
| Authentication                                                       | None of the cell lines used were authenticated                                                                                                                                                                                                                                                                       |
| Mycoplasma contamination                                             | All cell lines were negative for mycoplasma.                                                                                                                                                                                                                                                                         |
| Commonly misidentified lines<br>(See <a href="#">ICLAC</a> register) | Not used                                                                                                                                                                                                                                                                                                             |

## Animals and other organisms

Policy information about [studies involving animals](#); [ARRIVE guidelines](#) recommended for reporting animal research

|                         |                                                                                                                                                                        |
|-------------------------|------------------------------------------------------------------------------------------------------------------------------------------------------------------------|
| Laboratory animals      | New Zealand White (NZW) rabbits, male, age of 13 weeks                                                                                                                 |
| Wild animals            | This study did not involve wild animals.                                                                                                                               |
| Field-collected samples | This study did not involve samples collected from the field.                                                                                                           |
| Ethics oversight        | All animal studies were approved by the Animal Care and Use Committee of the Research Institute of Microbial Diseases, Osaka University, and Chugai Pharmaceutical Co. |

Note that full information on the approval of the study protocol must also be provided in the manuscript.

## Flow Cytometry

### Plots

Confirm that:

- The axis labels state the marker and fluorochrome used (e.g. CD4-FITC).
- The axis scales are clearly visible. Include numbers along axes only for bottom left plot of group (a 'group' is an analysis of identical markers).
- All plots are contour plots with outliers or pseudocolor plots.
- A numerical value for number of cells or percentage (with statistics) is provided.

### Methodology

|                           |                                                                                                                                                                      |
|---------------------------|----------------------------------------------------------------------------------------------------------------------------------------------------------------------|
| Sample preparation        | DKO cells, Ba/F3 cells, and their derivatives were cultured in RPMI1640 containing 10% FCS, collected by centrifugation, and suspended in Annexin V-staining buffer. |
| Instrument                | BD FACSCanto II (BD Biosciences)                                                                                                                                     |
| Software                  | Data was acquired using BD FACSDiva software v6.1.3, and analysed using FlowJo7.6.5                                                                                  |
| Cell population abundance | In some cases, stable transformant expressing the GFP-tagged XKR8 were sorted for GFP.                                                                               |
| Gating strategy           | Dead cells were omitted from the analysis by standard SSC/FFC gating, PI or SytoxRed                                                                                 |

Tick this box to confirm that a figure exemplifying the gating strategy is provided in the Supplementary Information.
