# Supplementary material for: The tertiary structure of the human Xkr8–Basigin complex that scrambles phospholipids at plasma membranes
Source: PubMed Central journal article supplement (PMC8500837; doi:10.1038/s41594-021-00665-8), 2021-10-08
Supplement: 41594_2021_665_MOESM4_ESM.pdf [file 41594_2021_665_MOESM4_ESM.pdf]

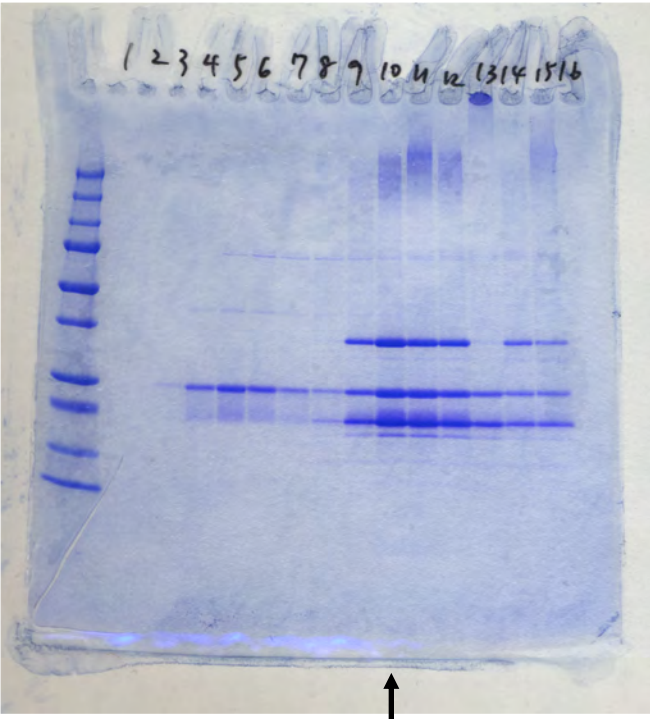

↑  
Fig. 1a (Left, Gel)

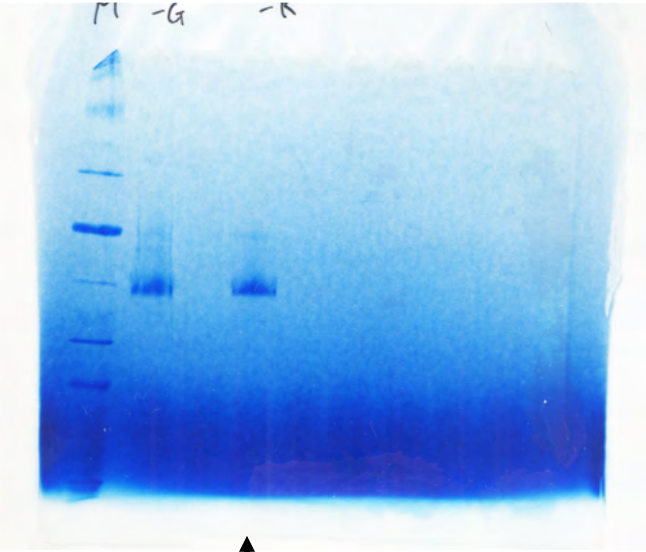

↑  
Fig. 1a (Right, Gel)
