# Supplementary material for: The tertiary structure of the human Xkr8–Basigin complex that scrambles phospholipids at plasma membranes
Source: PubMed Central journal article supplement (PMC8500837; doi:10.1038/s41594-021-00665-8), 2021-10-08
Supplement: 41594_2021_665_MOESM5_ESM.pdf [file 41594_2021_665_MOESM5_ESM.pdf]

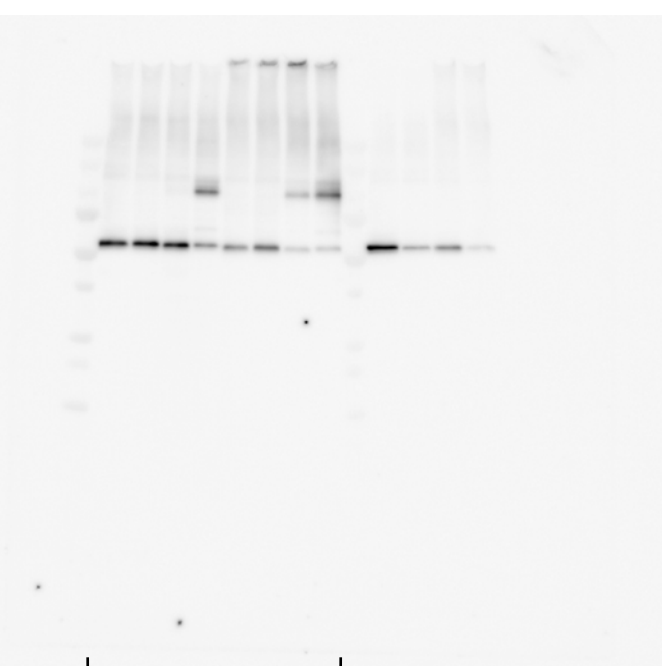

Fig. 2c (Top, Blot)

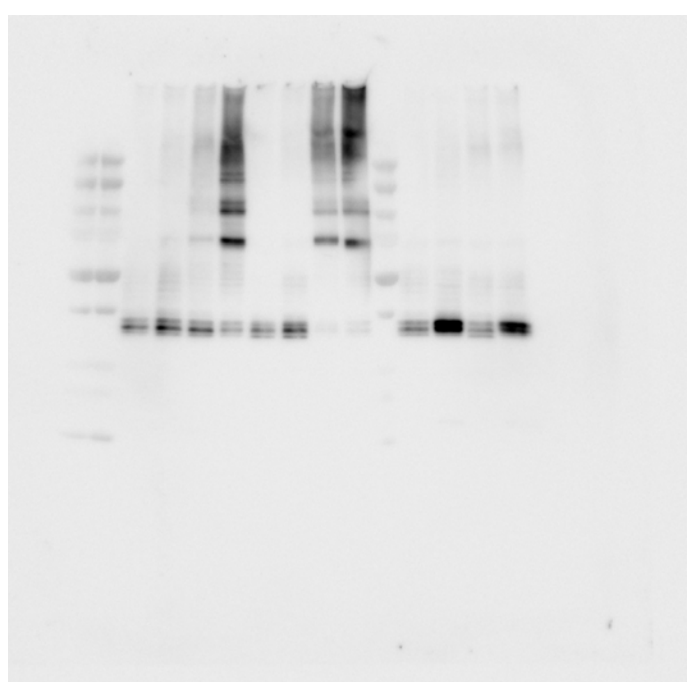

Fig. 2c (Bottom, Blot)

DKO/No BSG

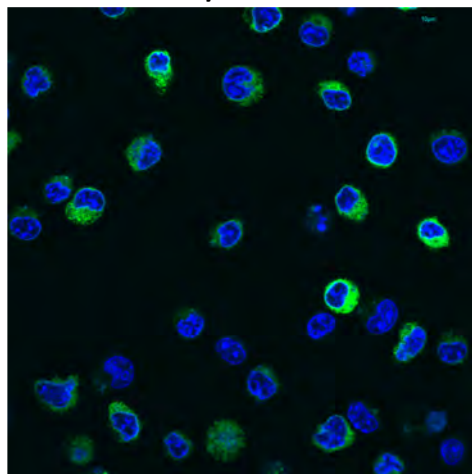

DKO/hBSG WT

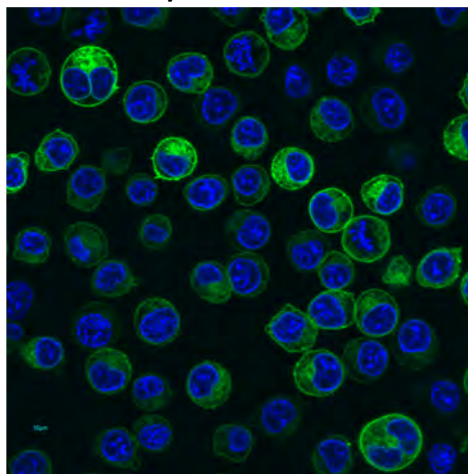

DKO/hBSG E230A

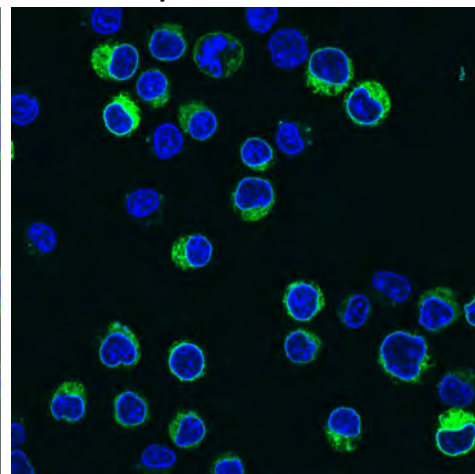

PLB/hXKR8 WT

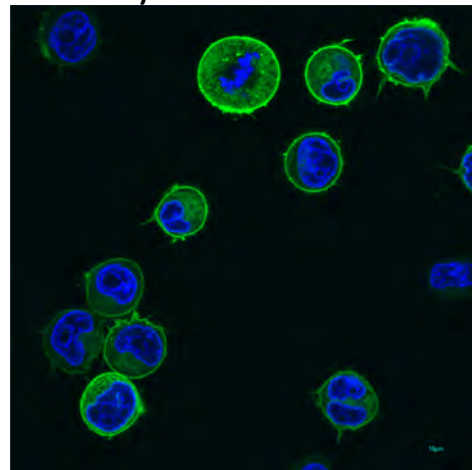

PLB/hXKR8 R280E

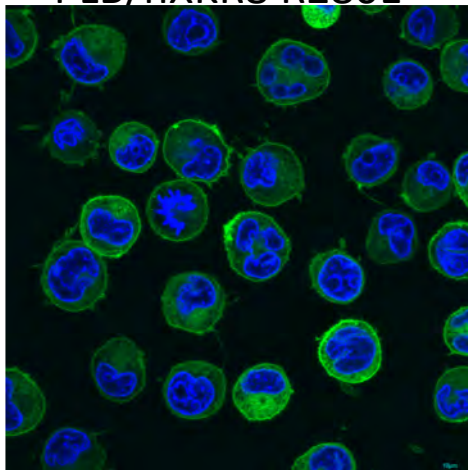

PLB/hXKR8 R284E

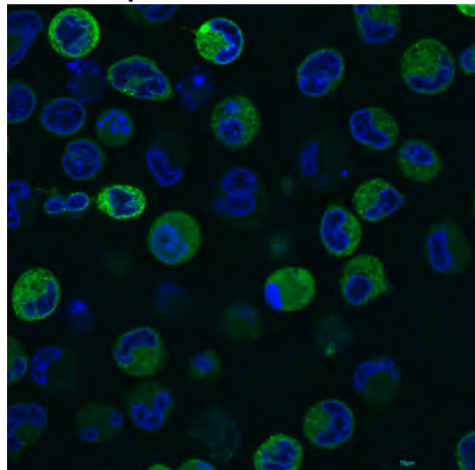

Fig. 2e (Picture)
