# Supplementary material for: The tertiary structure of the human Xkr8–Basigin complex that scrambles phospholipids at plasma membranes
Source: PubMed Central journal article supplement (PMC8500837; doi:10.1038/s41594-021-00665-8), 2021-10-08
Supplement: 41594_2021_665_MOESM6_ESM.pdf [file 41594_2021_665_MOESM6_ESM.pdf]

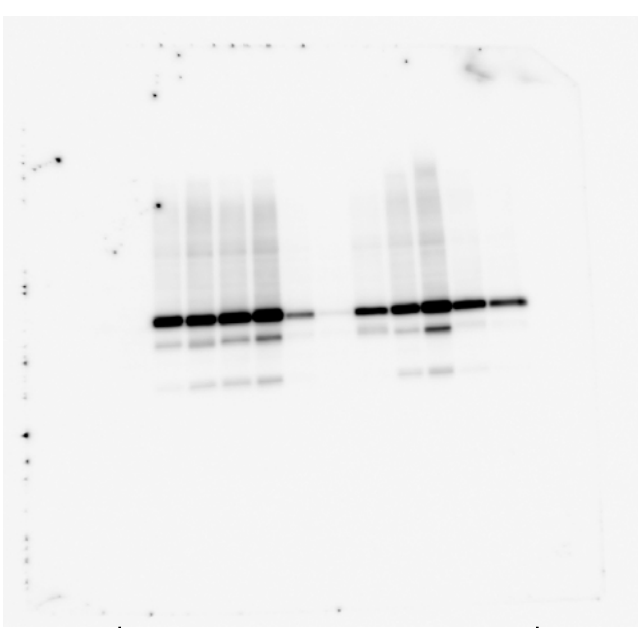

Fig. 3c (Left, Blot)

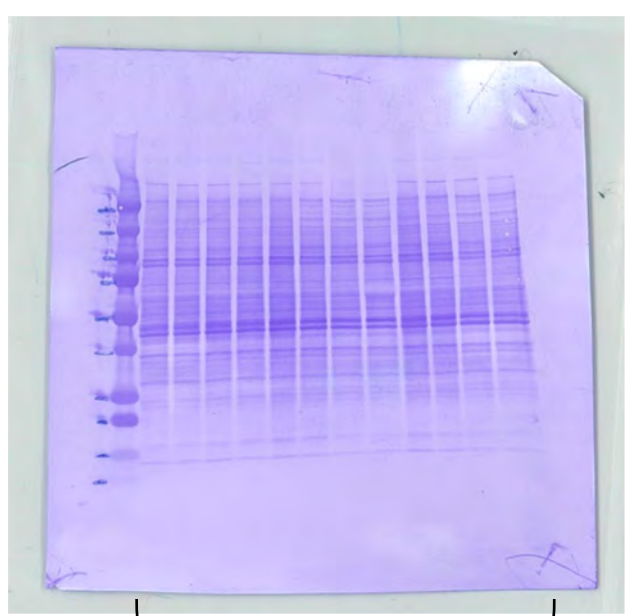

Fig. 3c (Left, CBB staining)

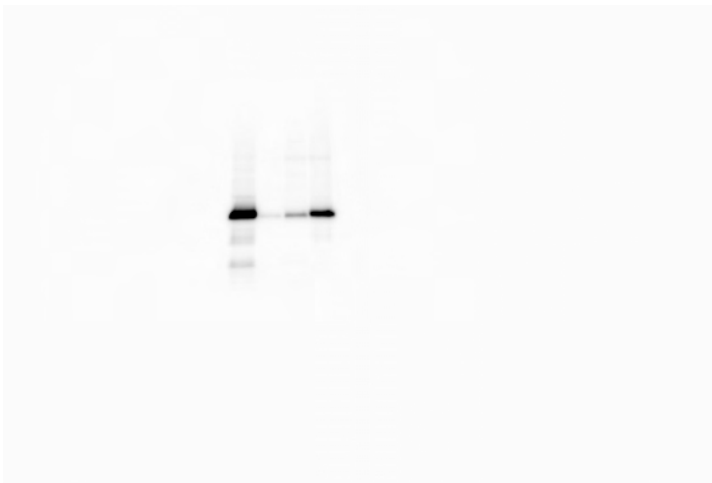

Fig. 3c (Right, Blot)

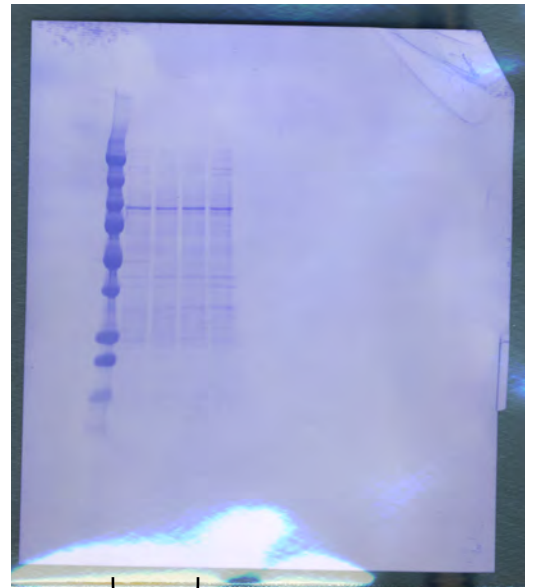

Fig. 3c (Right, CBB staining)

Ba/F3-WT

Ba/F3-D12A

Ba/F3-D26A

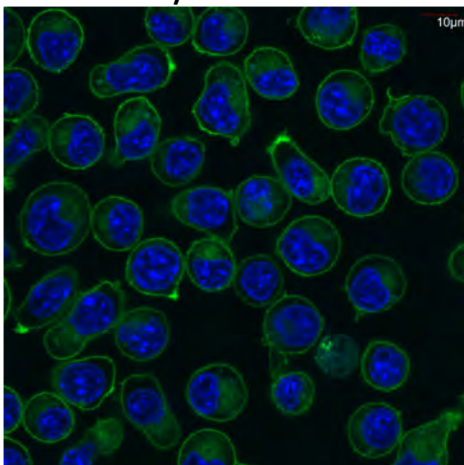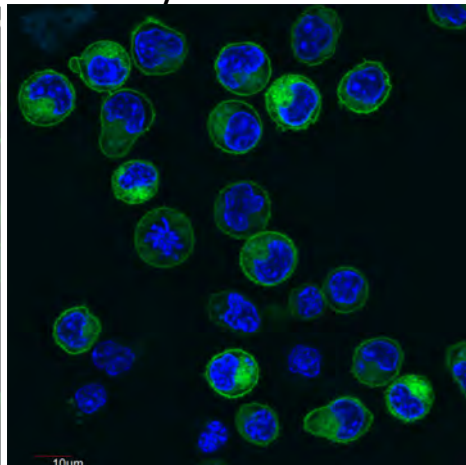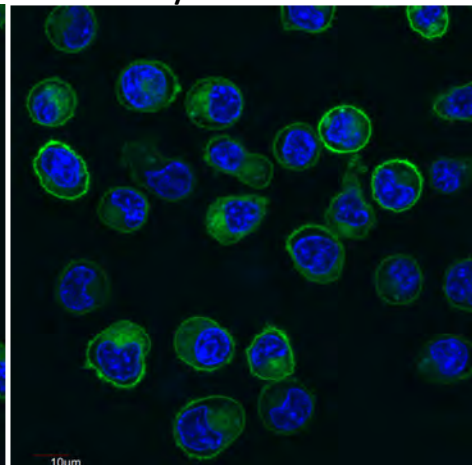

Fig. 3b (Picture)

Ba/F3-D30A

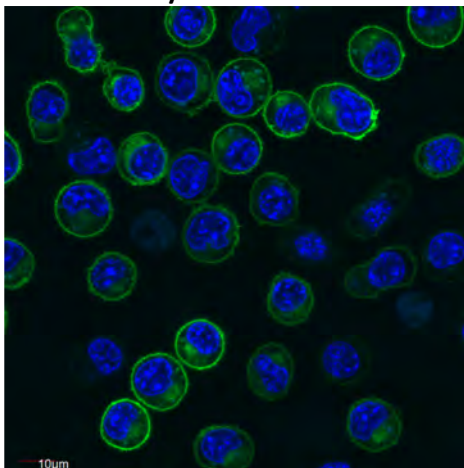

Ba/F3-R98A

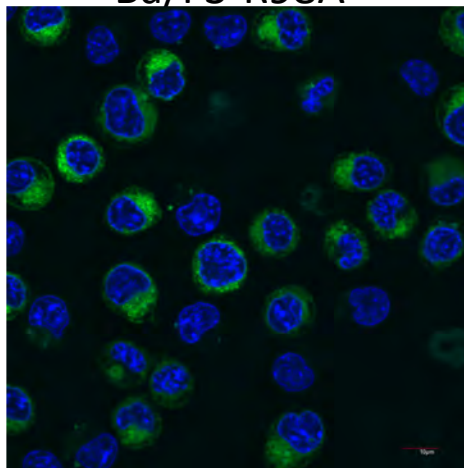

Ba/F3-D129A

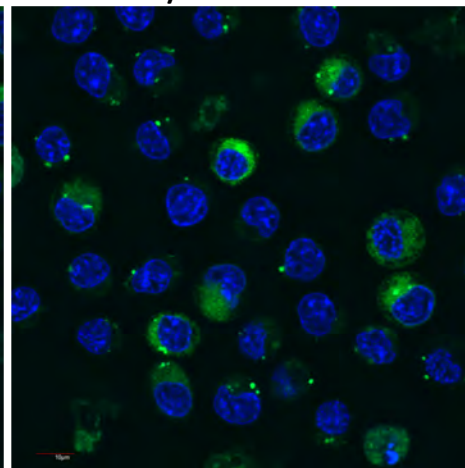

Ba/F3-K134A

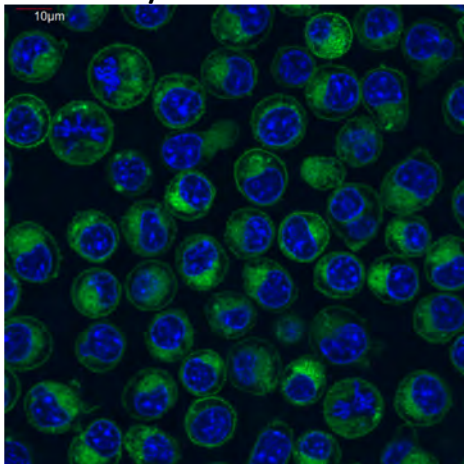

Ba/F3-E137A

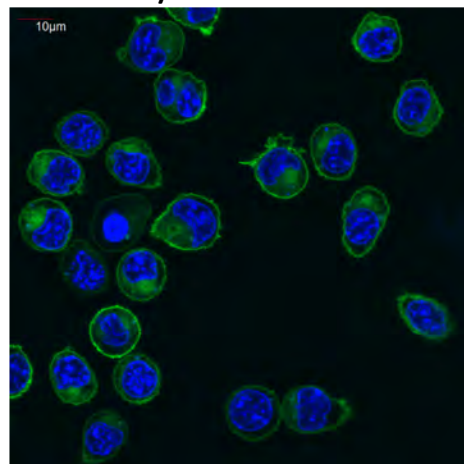

Ba/F3-E141A

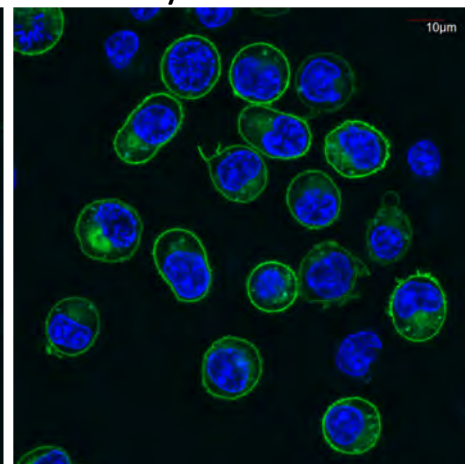

Ba/F3-D180A

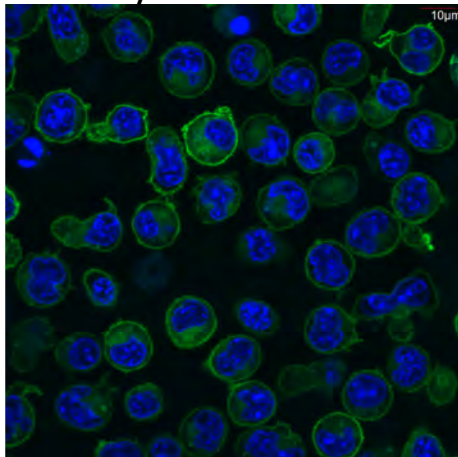

Ba/F3-R183A

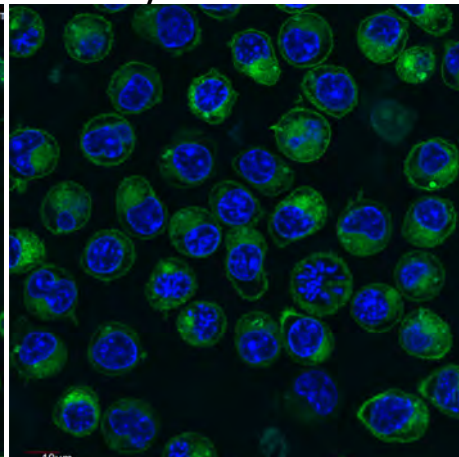

PLB-hXKR8 WT

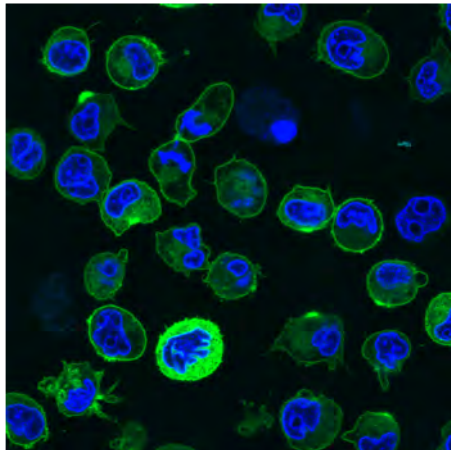

PLB-hXKR8 R214G

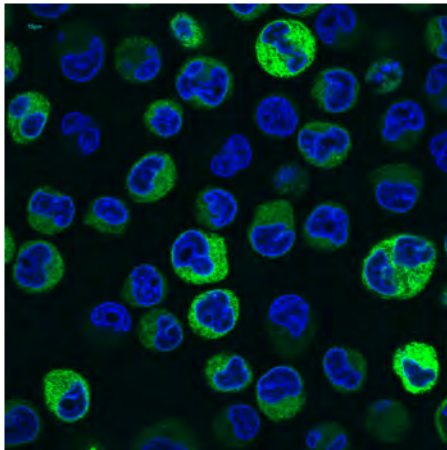

PLB-hXKR8 D295K

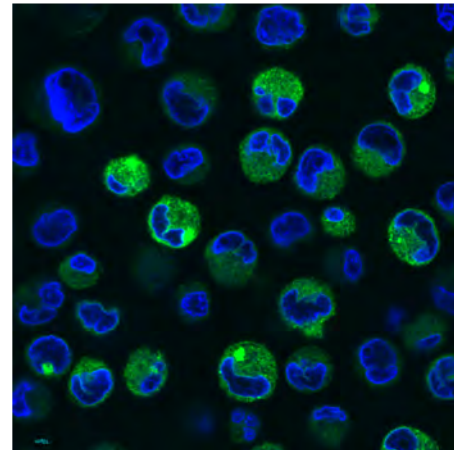

Fig. 3b (Picture)
