# Supplementary material for: The tertiary structure of the human Xkr8–Basigin complex that scrambles phospholipids at plasma membranes
Source: PubMed Central journal article supplement (PMC8500837; doi:10.1038/s41594-021-00665-8), 2021-10-08
Supplement: 41594_2021_665_MOESM8_ESM.pdf [file 41594_2021_665_MOESM8_ESM.pdf]

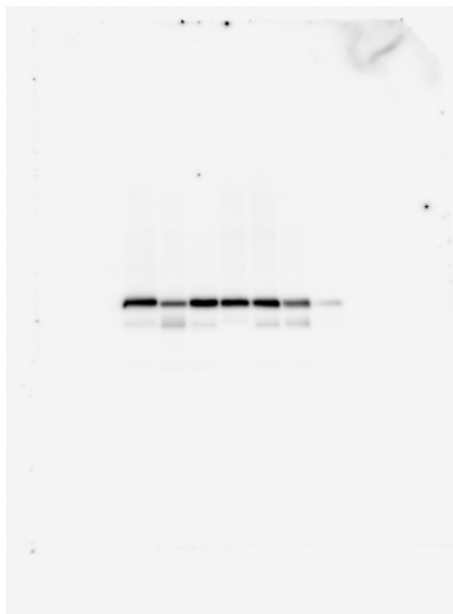

Fig. 5g (Blot)

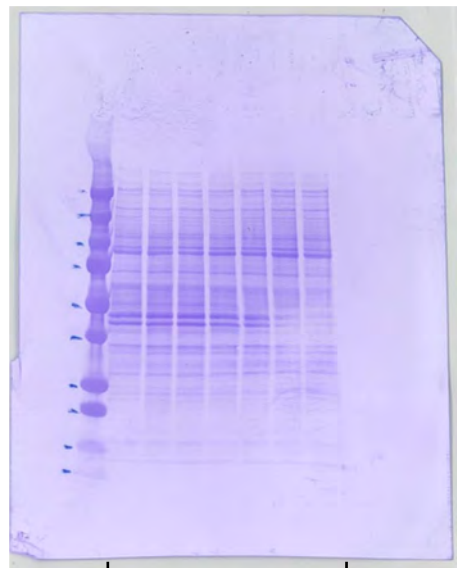

Fig. 5g (CBB staining)

WT

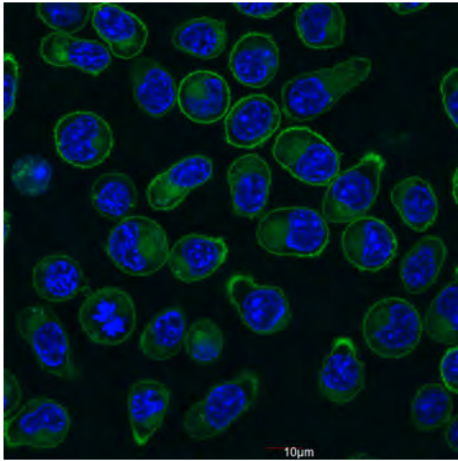

R42A

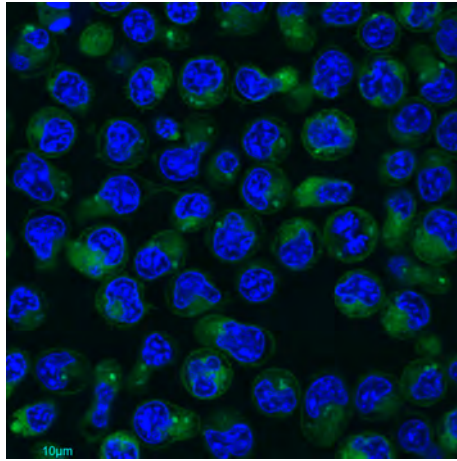

W45A

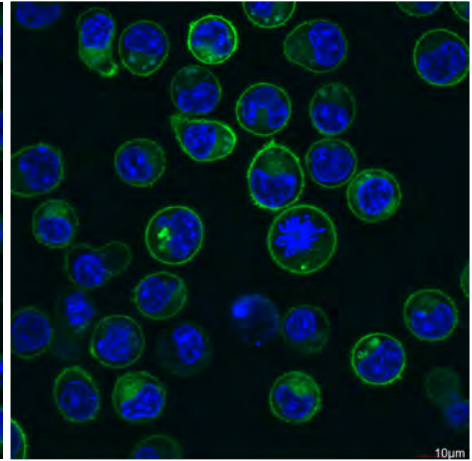

Q155A

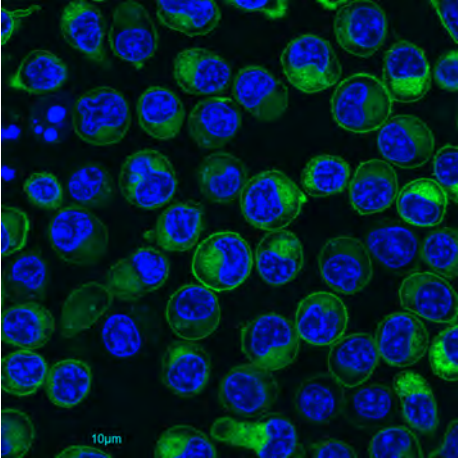

W310A

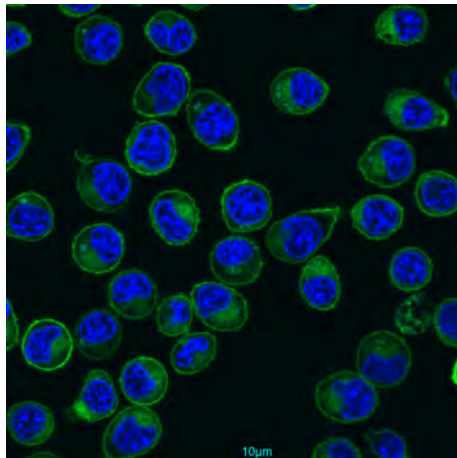

LV-3A

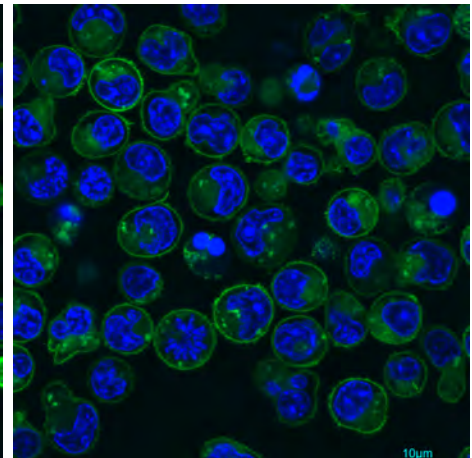

LVF-5A

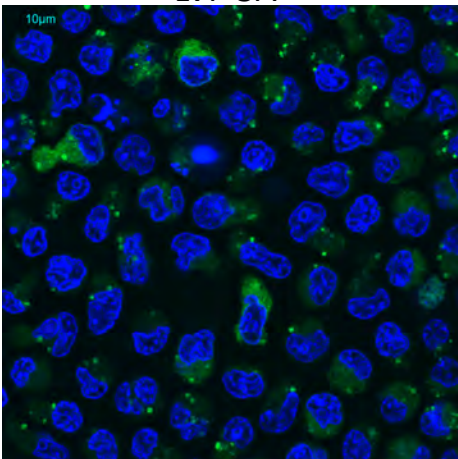

Fig. 5g (Picture)
